1 ***Anopheles stephensi* as an emerging malaria vector in the Horn of Africa with high**  
2 **susceptibility to Ethiopian *Plasmodium vivax* and *Plasmodium falciparum* isolates**

3 Temesgen Ashine<sup>1</sup>, Hiwot Teka<sup>1</sup>, Endashaw Esayas<sup>1</sup>, Louisa A. Messenger<sup>2</sup>, Wakweya  
4 Chali<sup>1</sup>, Lisette Meerstein-Kessel<sup>3</sup>, Thomas Walker<sup>2</sup>, Sinknesh Wolde Behaksra<sup>1</sup>, Kjerstin  
5 Lanke<sup>3</sup>, Roel Heutink<sup>3</sup>, Claire L. Jeffries<sup>2</sup>, Daniel Abebe Mekonnen<sup>1,4</sup>, Elifaged  
6 Hailemeskel<sup>1,3,4</sup>, Surafel K Tebeje<sup>1,3</sup>, Temesgen Tafesse<sup>1</sup>, Abrham Gashaw<sup>1</sup>, Tizita Tsegaye<sup>1</sup>,  
7 Tadele Emiru<sup>1</sup>, Kigozi Simon<sup>2</sup>, Eyuel Asemahegn Bogale<sup>1</sup>, Gedeon Yohannes<sup>5</sup>, Soriya  
8 Kedir<sup>6</sup>, Girma Shumie<sup>1</sup>, Senya Asfer Sabir<sup>1</sup>, Peter Mumba<sup>5</sup>, Dereje Dengela<sup>7</sup>, Jan H  
9 Kolaczinski<sup>8</sup>, Anne Wilson<sup>9</sup>, Thomas S Churcher<sup>10</sup>, Sheleme Chibsa<sup>11,12</sup>, Matthew  
10 Murphy<sup>11,12</sup>, Meshesha Balkew<sup>5</sup>, Seth Irish<sup>12,13</sup>, Chris Drakeley<sup>2</sup>, Endalamaw Gadisa<sup>1,\*</sup>, Teun  
11 Bousema<sup>2,3\*</sup>, Fitsum G Tadesse<sup>1,3,4+,\*</sup>

12 **Author affiliations:** <sup>1</sup>Armauer Hansen Research Institute, Addis Ababa, Ethiopia; <sup>2</sup>London  
13 School of Hygiene and Tropical Medicine, London, UK; <sup>3</sup>Radboud University Medical  
14 Center, Nijmegen, The Netherlands; <sup>4</sup>Addis Ababa University, Addis Ababa, Ethiopia;  
15 <sup>5</sup>President's Malaria Initiative VectorLink Ethiopia Project, Addis Ababa, Ethiopia; <sup>6</sup>Oromia  
16 Regional Health Bureau, Adama, Ethiopia; <sup>7</sup>President's Malaria Initiative VectorLink  
17 Project, Maryland, USA; <sup>8</sup>World Health Organization, Geneva, Switzerland; <sup>9</sup>Durham  
18 University, Durham, UK; <sup>10</sup>Imperial College London, London, UK; <sup>11</sup>United States Agency  
19 for International Development, Addis Ababa, Ethiopia; <sup>12</sup>United States President's Malaria  
20 Initiative, Atlanta, Georgia, USA; <sup>13</sup>Centers for Disease Control and Prevention, Atlanta,  
21 Georgia, USA.

22 **Biography of the first author:** Temesgen Ashine (MSc, Entomology) is a field  
23 entomologist and works at the Malaria and NTD directorate of Armauer Hansen Research

24 Institute as a research assistant, POBox 1005, Addis Ababa, Tel: +251912627540; Email:

25 [temeashine@gmail.com](mailto:temeashine@gmail.com)

26 **+Corresponding author:** Fitsum G Tadesse, Malaria and NTD directorate, Armauer Hansen

27 Research Institute, POBox 1005, Addis Ababa, Ethiopia, Tel: +251912627540; Email:

28 [fitsum.girma@ahri.gov.et](mailto:fitsum.girma@ahri.gov.et)

29 **\*These authors contributed equally to this article**

30 **Summary of the article:** *An. stephensi*, a metropolitan malaria vector that recently expanded

31 to the Horn of African, was highly susceptible to local *P. falciparum* and *P. vivax* isolates

32 from Ethiopia and may increase malariogenic potential of rapidly expanding urban settings in

33 Africa.

34 **Running title:** *An. stephensi* is an emerging vector in Africa

35 **Keywords:** *An. stephensi*, urban, vector competence, membrane feeding, emerging,

36 outbreak, transmission

37

38 **Abstract**

39 *Anopheles stephensi*, an efficient Asian malaria vector, recently spread into the Horn of  
40 Africa and may increase malaria receptivity in African urban areas. We assessed occurrence,  
41 genetic complexity, blood meal source and infection status of *An. stephensi* in Awash Sebat  
42 Kilo town, Ethiopia. We used membrane feeding assays to assess competence of local *An.*  
43 *stephensi* to *P. vivax* and *P. falciparum* isolates from clinical patients. 75.3% of the examined  
44 waterbodies were infested with *An. stephensi* developmental stages that were  
45 genetically closely related to isolates from Djibouti and Pakistan. Both *P. vivax* and *P.*  
46 *falciparum* were detected in wild-caught adult *An. stephensi*. Local *An. stephensi* was more  
47 receptive to *P. vivax* compared to a colony of *An. arabiensis*. We conclude that *An.*  
48 *stephensi* is an established vector in this part of Ethiopia, highly permissive for local *P.*  
49 *vivax* and *P. falciparum* isolates and presents an important new challenge for malaria  
50 control.

51

52

53

## 54 **Background**

55 With expanded global malaria control efforts there have been two decades of substantial  
56 declines in malaria cases and deaths. These successes were mainly attributable to wide-scale  
57 deployment of vector control tools and availability of efficacious treatment [1]. Control  
58 programs in Africa traditionally focus on rural settings, which is where most infections occur  
59 [2] although malaria transmission is also a health concern in some urban settings [3, 4].  
60 In 2015, 38% of Africans were living in urban settings; the number of Africans residing in  
61 urban areas is expected to double in the coming 25 years [5]. Urban settings can be sinks of  
62 malaria transmission primarily associated with importation of malaria from (rural) areas of  
63 intense transmission due to movement of people at the urban-rural interface [6]. With the  
64 adaptation of existing vectors to urban environments [7] and emerging vectors such as  
65 *Anopheles stephensi* in urban areas [8], malaria transmission in urban settings is becoming  
66 more likely. Urban areas can thereby form foci of active malaria transmission [9]. *An.*  
67 *stephensi* is an efficient vector for both *Plasmodium vivax* and *P. falciparum* in Asia and is  
68 the dominant malaria vector in India and the Persian Gulf [10]. *An. stephensi* predominantly  
69 breeds in urban settings with a preference for human-made water storage containers [11].  
70 Recent reports indicate that *An. stephensi* is spreading in the Horn of Africa (Djibouti [13],  
71 Ethiopia [14] and the Republic of Sudan [15]). *An. stephensi* emergence has been  
72 epidemiologically linked to an unusual resurgence in local malaria cases in Djibouti city [16].  
73 A recent technical consultative meeting convened at the World Health Organization (WHO)  
74 identified that there is potential for spread of *An. stephensi* across Africa and urged for more  
75 data on its distribution to allow monitoring of potential spread of *An. stephensi* from the  
76 currently affected areas and on the vector's susceptibility to local *Plasmodium* isolates [15].  
77

78 In the present study, we examined the abundance of *An. stephensi* in an urban setting in  
79 Ethiopia, characterized its aquatic habitats, biting and resting behavior, and, for the first time,  
80 examined its competence to transmit local *P. vivax* and *P. falciparum* isolates.

81

## 82 **Methods**

### 83 **Description of study site**

84 This study was conducted in Awash Sebat Kilo town (916 meters above sea level;  
85 8°58'59.99" N 40°10'0.01" E), on the main transportation corridor from Addis Ababa (220km  
86 southeast) to Djibouti (Figure 1). The town has an estimated total population of 24,700 [17];  
87 the semi-arid climate is dominated by a major rainy season (July-August) and short  
88 intermittent rains (April/May) and an average temperature of 25.8°C (17.3°C-33.6°C) [18].  
89 The Awash River Valley is the most irrigated area in the country with extensive river-fed  
90 agriculture. Malaria transmission is perennial in the area surrounding the town with annual  
91 parasite incidence of 536 per 1000 population in 2019 (five-year trend summarized in  
92 supplemental notes). Entomological surveys conducted in 2018 detected the occurrence of  
93 *An. stephensi* in Awash Sebat Kilo town [19].

### 94 **Characterization of aquatic habitat, resting, feeding and biting behavior**

95 Aquatic sites were examined for the presence of *Anopheles* developmental stages by standard  
96 dipping (10x) for 5 consecutive days. Developmental stages were separated from culicines in  
97 the field and transported to Adama malaria center for rearing to adults. The resting, feeding  
98 and host-seeking behavior of *An. stephensi* was assessed using five conventional  
99 entomological sampling techniques: i) Centers for Disease Control (CDC) miniature light  
100 traps (Johns W. Hocks Company model 512) catches, ii) human landing catches (HLC), iii)  
101 pyrethrum spray sheet collection (PSC), iv) aspiration from animal shelters, and v) cattle-  
102 baited traps (Supplemental notes). Adult mosquitoes were identified morphologically using  
103 standard identification keys [20]. Fully fed mosquitoes identified as *An. stephensi* were kept  
104 in paper cups at Adama laboratory in ambient conditions and allowed to lay eggs on filter  
105 papers soaked in water on a cotton roll for egg ridge counts (Supplemental notes).

106

107 **Mosquito rearing and membrane feeding assay**

108 *An. stephensi* were reared from larvae/pupae (from aquatic site examinations) to adult at  
109 ambient temperature ( $26\pm 3^{\circ}\text{C}$ ) and relative humidity ( $70\pm 10\%$ ) and fed with fish food  
110 (Cichlid Sticks; King British Fish Food, Tetra). *An. arabiensis*, the principal malaria vector  
111 of Ethiopia, from an established colony were reared under identical conditions and  
112 maintained with 10% sucrose solution. Following informed consent, patients who presented  
113 to the Adama malaria clinic with microscopy confirmed *P. vivax* and *P. falciparum* mono-  
114 and mixed-species infections were asked to donate venous blood sample (5mL) in lithium  
115 Heparin tubes (BD Vacutainer®). Asexual parasite and gametocyte densities were quantified  
116 by two expert microscopists on thick blood films prepared from finger prick blood samples,  
117 screening against 1000 leukocytes. Thin blood films were examined to identify *Plasmodium*  
118 species.

119 Four-to-seven day old adult *An. stephensi* and *An. arabiensis* were starved for 3 (*An.*  
120 *stephensi*) or 12 hours (*An. arabiensis*) before feeding. One hundred and twenty mosquitoes  
121 of each species, 40 in each of 3 paper cups, were fed fresh patient blood through membrane  
122 in the dark for exactly 25 minutes (Supplemental notes). Fully fed mosquitoes were  
123 maintained under the same laboratory conditions with 10% sucrose solution for 7 days post  
124 feeding before being dissected for oocyst detection and for 12 days for sporozoite detection.

125 **Molecular detection of parasites and blood meal sources and targeted sequencing of**  
126 **morphologically identified *An. stephensi* mosquitoes**

127 *Plasmodium* infection status of individual wild-caught morphologically-confirmed adult *An.*  
128 *stephensi* mosquitoes was assessed using nested polymerase chain reaction (nPCR) targeting  
129 the small 18S subunit [21] using genomic DNA extracted from homogenate of mosquito's

130 head-thorax and abdomen separately [22], indicating sporozoite and oocyst-stage infections,  
131 respectively. Multiplex PCR that targets the mitochondrial cytochrome b gene and produces  
132 species-specific fragments of varying sizes was used to assess blood meal sources of  
133 individual mosquitoes [23]. For confirmation of morphologically identified *An. stephensi*,  
134 DNA was extracted from whole mosquito bodies using the DNeasy Blood and Tissue kit  
135 (Qiagen, UK). PCR was performed for each individual mosquito, targeting the nuclear  
136 internal transcribed spacer 2 region (ITS2) and the mitochondrial cytochrome oxidase  
137 subunit 1 gene (COI) [24]. Following PCR clean-up (Source BioScience Plc, Nottingham,  
138 UK), chain termination sequencing was performed to generate unambiguous consensus  
139 sequences for each sample (Supplemental notes). Sequences were assembled manually in  
140 BioEdit v7.2.5 [25] to create unambiguous consensus sequences for each sample. Consensus  
141 sequence alignments per gene were generated in ClustalW and used to perform nucleotide  
142 BLAST (NCBI) database queries [26]. *An. stephensi* ITS2 and COI sequences, from across  
143 the vector's geographic range, were downloaded from GenBank for phylogenetic analysis in  
144 MEGA X [27]. Additional outgroup ITS2 sequences were retrieved for *An. maculatus*, *An.*  
145 *maculipalpis*, *An. sawadwongporni* and *An. willmori*. Alternate maximum-likelihood (ML)  
146 phylogenies were constructed using the Jukes-Cantor (ITS2; final tree  $lnL=-916.913$ ) or  
147 Tamura-Nei (COI; final tree  $lnL=-732.248$ ) models, following appropriate nucleotide  
148 substitution model selection in MEGA X. Bootstrap support for clade topologies was  
149 estimated following the generation of 1000 pseudoreplicate datasets.

## 150 **Statistical analysis**

151 Analyses were performed in STATA version 13 (StataCorp., TX, USA) and GraphPad Prism  
152 5.3 (GraphPad Software Inc., CA, USA). Feeding efficiency (proportion of fully fed  
153 mosquitoes) was compared in matched experiments using the Wilcoxon matched-pairs



154 signed-ranks test. Logistic regression was performed to compare infection status between *An.*  
155 *arabiensis* and *An. stephensi* using individual mosquito data and a fixed effect for each  
156 human participant to account for correlations between mosquito observations from the same  
157 donor. Bland-Altman plots were generated for differences in infectivity between mosquito  
158 sources with Pitman's test of difference in variance.  
159

160 **Results**

161 **Most of the potential aquatic habitats were infested with *An. stephensi* developmental**  
162 **stages**

163 Eighty-five water bodies within Awash Sebat Kilo town were assessed for *An. stephensi*  
164 larvae and pupae. All of these water reservoirs were human-made (Figure 2; Supplemental  
165 notes). *An. stephensi* larvae were detected in 75.3% (64/85) of sites (Table 1; Supplemental  
166 notes); of which the final aquatic developmental stage (pupae) were detected in 37.5%  
167 (24/64) of the waterbodies. Larvae were more commonly found in permanent (85.4%, 41/48)  
168 compared to temporary containers (63.9%, 23/36;  $P=0.022$ ). The most common water body  
169 co-inhabitants were *Aedes aegypti* (39.1%, 25/64) and culicine mosquitoes (23.4%, 15/64). A  
170 total of 49,393 immature *Anopheles* larvae and pupae were collected in 20 visits for rearing;  
171 of which 45,316 (91.7%) emerged to adults. Morphological identification of 1,672 female  
172 *Anopheles* confirmed that all were *An. stephensi*.

173 **Adult mosquitoes rest mainly in animal shelters and feed also on humans and are**  
174 **infected with *Plasmodium***

175 A total of 89 adult female *Anopheles* mosquitoes, the majority of which were blood fed (72),  
176 were collected in two monthly rounds (6 days each) of entomological surveillance (August  
177 and September 2019) with a median of 10 *Anopheles* mosquitoes per productive trapping  
178 night (range 1-22). The majority (80.9%, 72/89) were morphologically identified as *An.*  
179 *stephensi*; the remainder were *An. gambiae* (n=16) and *An. pharoensis* (n=1). Most of the *An.*  
180 *stephensi* mosquitoes were collected from animal shelters (91.7%, 66/72); the remainder  
181 (8.3%, 6/72) were collected outdoors using HLC (Supplemental note). Almost half (43.8%,  
182 7/16) of the *An. gambiae* were caught by CDC light traps, but no *An. stephensi* mosquitoes  
183 were caught by this method. Of the adult caught *An. stephensi*, for two non-blood-fed

184 mosquitoes the abdomen was positive for *P. vivax* (2.2%, 2/89) indicating oocyst level  
185 infection and one blood-fed mosquito collected from an animal shelter was positive for *P.*  
186 *falciparum* (1.1%, 1/89). From blood meal analysis the majority of adult *An. stephensi* had  
187 fed on animals (52.8%, 38/72); such as goat (n=23), cow (n=7) and dog (n=5) with a non-  
188 negligible number of them feeding on humans (12.5%, 9/72) (Supplemental notes). A quarter  
189 of them (23.4%, 11/47) fed on multiple sources including humans.

### 190 ***An. stephensi* are highly susceptible to infection with Ethiopian *Plasmodium* isolates**

191 A total of 47 paired membrane feeding experiments were conducted using blood from  
192 patients with microscopy confirmed *P. vivax* (n=36), *P. falciparum* (n=7) and mixed *P. vivax*  
193 and *P. falciparum* (n=4) infections (Table 2). The majority of patients were female (73.8%,  
194 31/42) with a median age of 27 years (IQR, 19-38). Gametocytes were detected by  
195 microscopy in the majority of *P. vivax* mono-species infected patients (73.5%, 25/34) but  
196 fewer in patients with *P. falciparum* (14.3%, 1/7) and mixed species infections (25.0%, 1/4;  
197 only *P. vivax* gametocytes). A total of 4,088 female *An. stephensi* raised from field collected  
198 larvae/pupae were fed alongside age-matched 6,130 colony derived *An. arabiensis*. The  
199 proportion of blood fed mosquitoes was generally higher for *An. arabiensis* (median, 80.5%;  
200 IQR, 72.5-85.0) compared to *An. stephensi* (median, 53.5%; IQR, 44.0-68.0;  $P < 0.001$ ;  
201 Figure 3A).

202 For each blood feeding experiment, an average of 24 (range, 10-33) *An. stephensi* and 28  
203 (range, 19-32) *An. arabiensis* mosquitoes were dissected for oocysts on day 7 post feeding.  
204 Overall, 72.2% (26/36) *P. vivax*, 14.3% (1/7) *P. falciparum* and 50.0% (2/4) mixed species  
205 infected patients infected at least one *An. arabiensis* and one *An. stephensi* mosquito. A very  
206 strong association was observed between the proportions of the two mosquito species  
207 infected with *P. vivax* ( $\rho = 0.82$ ,  $P < 0.001$ ; Figure 3B) with a statistically significant higher

208 proportion of infected mosquitoes for *An. stephensi* (median, 75.1%; IQR, 60.0-85.9)  
209 compared to *An. arabiensis* (median, 58.4%; IQR, 40.0-85.6;  $P<0.042$ ). Allowing for the  
210 number of dissected mosquitoes for each set of paired feeding experiments results in higher  
211 odds of infectivity to an individual mosquito for *An. stephensi* (Odds Ratio [OR], 1.99; 95%  
212 CI, 1.52-2.59;  $P<0.001$ ) (Figure 3C).

213 Oocyst intensity per infected midgut was higher for *An. stephensi* (median, 17; IQR, 6-33)  
214 than *An. arabiensis* (median, 13; IQR, 4-30;  $P<0.001$ ; Figure 4A). Oocyst intensity  
215 associated positively with oocyst prevalence for both *An. stephensi* ( $\rho=0.553$ ,  $P<0.001$ ) and  
216 *An. arabiensis* ( $\rho=0.576$ ,  $P<0.001$ ) mosquitoes (Figure 4B). To further determine  
217 competence for transmission, random subsets of blood-fed mosquitoes from six paired feeds  
218 were kept until day 12 post feeding for sporozoite quantitation in salivary glands. Sporozoites  
219 were detected in both mosquito species and higher sporozoite loads were detected for  
220 mosquitoes from batches where oocyst prevalence and intensity were higher (Supplemental  
221 notes). Among paired feedings, after accounting for number of examined salivary glands, the  
222 odds of detection of sporozoites was substantially higher in *An. stephensi* (OR, 4.6; 95% CI,  
223 2.2-9.9;  $P<0.001$ ) compared to *An. arabiensis*.

224 **Sequencing confirms Ethiopian *An. stephensi* mosquitoes are closely related to *An.***  
225 ***stephensi* from Djibouti and Pakistan**

226 DNA extracted from 99 mosquitoes representing all larval habitats was used for  
227 determination ITS2 and COI sequences. Of these, 76 were successfully amplified and  
228 sequenced for ITS2 while 45 were successfully amplified and sequenced for COI. All of  
229 sequences were confirmed to be *An. stephensi*. The ITS2 phylogeny was constructed from a  
230 consensus alignment of 301bp, containing 124 variable sites; the COI phylogeny was  
231 constructed from a consensus alignment of 465bp, containing 17 variable sites. The ITS2 tree

232 indicated that *An. stephensi* from Ethiopia form a well-supported monophyletic clade  
233 (bootstrap value of 100%) with all other *An. stephensi* sequences from across the Arabian  
234 Peninsula and South-East Asia (Figure 5). The COI tree was more resolute, suggesting *An.*  
235 *stephensi* from Ethiopia were most closely related to mosquitoes from Djibouti (64%) and  
236 Pakistan (54%). Four haplotypes using COI and two genotypes using ITS2 were detected.  
237

## 238 **Discussion**

239 In this study, we examined the abundance, behavior and vector competence of *An. stephensi*  
240 in an Ethiopian town, Awash Sebat Kilo. *An. stephensi* was the dominant vector, larvae being  
241 present in the majority of examined human-made water bodies. The detection of *Plasmodium*  
242 developmental stages in adult *An. stephensi* demonstrates its receptivity to local parasites.  
243 This was further demonstrated by mosquito feeding assays where *An. stephensi* more  
244 frequently became infected and infectious when feeding on blood of *P. vivax* patients  
245 compared to an insectary adapted colony of *An. arabiensis*. These data demonstrate the  
246 widescale presence of a novel efficient vector in this urban area in Ethiopia.  
247 Originally reported in India, *An. stephensi* has expanded westward from the Persian Gulf,  
248 documented in farms and within the capital city of Kuwait in 1981 [28] and subsequently in  
249 the Riyadh region of Saudi Arabia in 2007 [29]. More recently, it spread into the Horn of  
250 Africa where it was reported in Djibouti city in 2013 [13] and Ethiopia in 2016 [14]. The  
251 recent emergence in the Republic of Sudan [15] and more widespread sites in Ethiopia [19]  
252 in 2019 suggests the species has the potential to become a widespread African malaria  
253 vector. Our data demonstrate that *An. stephensi* is firmly established in an urban setting in  
254 Ethiopia located on the main transportation corridor from Djibouti to Addis Ababa. The  
255 detection of four haplotypes using COI and two genotypes using ITS2 suggests the  
256 independent arrival of different populations or heterogeneity arising after the importation of  
257 the mosquito species. Our findings further corroborate recent suggestions that *An. stephensi*  
258 in Ethiopia is closely related to populations from Pakistan [14]. Regardless of its origin, it is  
259 evident from our data that the mosquito is abundantly present; of the 85 water bodies  
260 examined, 64 were infested with developmental stages of *An. stephensi* even in the driest  
261 months of the year (May/June), further indicating how well-suited the mosquito is to local

262 weather conditions and the availability of human-made water storage containers. The number  
263 of larvae/pupae we detected (~50,000 in twenty rounds of sampling) and the development to  
264 adulthood (>90%) is an alarming confirmation of adaptation in this setting.

265 Uniquely, we directly determined the vector competence of wild-caught *An. stephensi* to  
266 naturally circulating *Plasmodium* parasites from malaria patients via membrane feeding in  
267 comparison to an established and membrane-adapted colony of *An. arabiensis* [31]. Our  
268 mosquito feeding experiments predominantly included *P. vivax* clinical cases who are highly  
269 infective [31, 32], and allow a sensitive comparison of mosquito species. Although the  
270 membrane adapted colony of *An. arabiensis* had high feeding rates, mosquito infection rates  
271 were statistically significantly higher for *An. stephensi* than for *An. arabiensis*. Our detection  
272 of salivary gland sporozoites establishes that sporogonic development of local *P. vivax* can  
273 be completed by *An. stephensi*. We recruited fewer clinical *P. falciparum* cases who, in line  
274 with other findings, were less likely to infect mosquitoes compared to *P. vivax* patients [31].  
275 Despite a modest number of observations, our findings demonstrate that also local *P.*  
276 *falciparum* isolates are capable of infecting *An. stephensi*. This *ex vivo* evidence of  
277 susceptibility to local *Plasmodium* isolates is further supported by the detection of adult  
278 mosquitoes infected with *P. falciparum* and *P. vivax*. This is, to our knowledge, the first  
279 direct evidence of infected *An. stephensi* in Ethiopia.

280 The spread of *An. stephensi* can be linked with movement of goods and people [13] and the  
281 favorable conditions created by rapid social development and urbanization [33] that is  
282 accompanied by increased availability of aquatic habitats in the form of water storage tanks.  
283 Rapidly expanding urbanization often leads to informal settlements with poor housing and  
284 sanitation [34]. Although housing conditions are improving in Africa, particularly in urban  
285 settings, there are still major gaps such as poor estimates of combined water, sanitation and

286 hygiene coverage [35]. Establishment and potential spread of *An. stephensi* in the Horn of  
287 Africa poses considerable health risks of increased receptivity and local transmission of  
288 malaria in the increasing urban African settings requiring realignment of malaria control  
289 programs. Its frequent presence in human-made aquatic habitats [37] indicates that a simple  
290 bifurcation between urban and rural settings may be misleading and is context dependent.  
291 Additionally, urban populations are also at increased risk of *Aedes*-borne diseases, which are  
292 increasing in incidence in Africa [38-41]. We regularly detected developmental stages of  
293 both *An. stephensi* and *Aedes* in the same water body [42]. Outbreaks of chikungunya [43],  
294 dengue [44], and yellow fever [45] were recently reported from Ethiopia within the same  
295 geographic setting. The WHO recommends the use of integrated vector management [46] –  
296 an adaptive and evidence-based approach to vector control which utilizes vector control  
297 interventions from within and outside the health sector that may include larval source  
298 management of both *An. stephensi* and *Aedes* vectors. Our findings support that larval source  
299 management may be considered to prevent further spread of *An. stephensi* and *Aedes*-borne  
300 disease outbreaks in African towns and cities and beyond their territories [47]. Further  
301 investigation is required to understand how *An. stephensi* respond to the existing and novel  
302 insecticides and vector control strategies.

303



304 **Declarations**

305 **Ethics approval and consent to participate:** The study protocol was reviewed and  
306 approved by the Institutional Ethical Review Board of the Akilu Lemma Institute of  
307 Pathobiology of Addis Ababa University (Ref.No. ALIPB IRB/025/2011/2019), the Oromia  
308 Regional Health Bureau (Ref. No BEFO/MBTFH/1331), and AHRI/ALERT Ethics Review  
309 Committee (Ref.No.AF-10-015.1, PO07/19). All participants provided written informed  
310 consent; parent/legal guardians for participants younger than 18 years. Those collecting  
311 human landing collections also provided written informed consent and were monitored for 3  
312 weeks following collections and treated if any malaria symptoms occurred.

313 **Consent for publication:** It was clearly indicated on the information sheet provided to the  
314 study participants that data generated from the study will be anonymously communicated to  
315 the wider scientific community in the form of peer-reviewed scientific publication.

316 **Availability of data and materials:** Data used to make the major conclusions of the study  
317 will be available together with this article and detailed data can be provided up on request.

318 **Competing interests:** All authors declare that they don't have competing interests.

319 **Funding:** The study was supported by the Bill and Melinda Gates Foundation grant (INDIE  
320 OPP1173572) to FGT, TB and CD. The Armauer Hansen Research Institute (AHRI) has  
321 supported WC, TA, EH, and EG through its Core funding from Sida and Norad. PMI  
322 VectorLink Ethiopia Project for financial support of the adult collection. CLJ and TW were  
323 supported by Wellcome Trust /Royal Society fellowships awarded to TW (101285/Z/13/Z):  
324 <http://www.wellcome.ac.uk>; <https://royalsociety.org>

325 **Authors' contributions:** Conceived the study: HT, PM, SC, MM, MB, SI, CD, EG, TB,  
326 FGT; participated in guiding the field activities: PM, DD, SC, MM, MB, SI, JHK, AW, CD,  
327 EG, TB, FGT; collected the developmental stages (larvae and pupae): TA, EE; reared adult

328 mosquitoes, collected blood samples, run feeding experiments, dissected mosquitoes: TA,  
329 EE, WC, SWB, DAM, EH, SKT, TT, AG, TT, TE, GY, SK, GS, SAS; conducted laboratory  
330 works: TA, HT, EE, LAM, WC, TW, SWB, KL, RH, CLJ, DAM, EH, SKT, TT, AG, TT,  
331 TE, FGT; analyzed data: TA, LAM, LMK, KS, TSC, SI, CD, EG, TB, FGT; drafted the  
332 manuscript: TA, HT, EE, LAM, TW, CLJ, CD, EG, TB, FGT; critically commented on the  
333 manuscript: JHK, AW, TSC, SI, CD, EG, TB, FGT. All authors read and approved the final  
334 manuscript.

335 **Acknowledgements:** We would like to acknowledge the study participants for their  
336 willingness to donate blood samples and allow assessment of mosquito exposure. We thank  
337 the microscopists (Tewabech Lema and Tsehay Orlando) at Adama malaria clinic for their  
338 support. Appreciation also goes to the regional and district health officers for their  
339 collaboration and PMI VectorLink Ethiopia Project for training the field team. The drivers  
340 from AHRI played an important role on making the study successful. The findings and  
341 conclusions in this report are those of the author(s) and do not necessarily represent the  
342 official position of the Centers for Disease Control and Prevention.

343

344 **References**

- 345 1. O'Meara WP, Mangeni JN, Steketee R, Greenwood B. Changes in the burden of  
346 malaria in sub-Saharan Africa. *The Lancet Infectious Diseases* **2010**; 10(8): 545-55.
- 347 2. Fillinger U, Lindsay SW. Larval source management for malaria control in Africa:  
348 myths and reality. *Malar J* **2011**; 10(1): 353.
- 349 3. Wilson ML, Krogstad DJ, Arinaitwe E, et al. Urban Malaria: Understanding its  
350 Epidemiology, Ecology, and Transmission across Seven Diverse ICEMR Network  
351 Sites. *Am J Trop Med Hyg* **2015**; 93(3 Suppl): 110-23.
- 352 4. Dash AP, Valecha N, Anvikar AR, Kumar A. Malaria in India: challenges and  
353 opportunities. *J Biosci* **2008**; 33(4): 583-92.
- 354 5. The World Bank. Productive, Livable Cities Will Open Africa's Doors to the World.  
355 Available at: [https://www.worldbank.org/en/region/afr/publication/africa-cities-](https://www.worldbank.org/en/region/afr/publication/africa-cities-opening-doors-world)  
356 [opening-doors-world](https://www.worldbank.org/en/region/afr/publication/africa-cities-opening-doors-world). Accessed 08 November.
- 357 6. Molina Gomez K, Caicedo MA, Gaitan A, et al. Characterizing the malaria rural-to-  
358 urban transmission interface: The importance of reactive case detection. *PLoS Negl*  
359 *Trop Dis* **2017**; 11(7): e0005780.
- 360 7. Azrag RS, Mohammed BH. *Anopheles arabiensis* in Sudan: a noticeable tolerance to  
361 urban polluted larval habitats associated with resistance to Temephos. *Malar J* **2018**;  
362 17(1): 204.
- 363 8. Seyfarth M, Khaireh BA, Abdi AA, Bouh SM, Faulde MK. Five years following first  
364 detection of *Anopheles stephensi* (Diptera: Culicidae) in Djibouti, Horn of Africa:  
365 populations established-malaria emerging. *Parasitol Res* **2019**; 118(3): 725-32.

- 366 9. Chaparro PE, Molina K, Alzate A, Padilla J, Arevalo-Herrera M, Herrera S. Urban  
367 malaria transmission in a non-endemic area in the Andean region of Colombia. Mem  
368 Inst Oswaldo Cruz **2017**; 112(12): 797-804.
- 369 10. Sinka ME, Bangs MJ, Manguin S, et al. The dominant *Anopheles* vectors of human  
370 malaria in the Asia-Pacific region: occurrence data, distribution maps and bionomic  
371 précis. Parasites & vectors **2011**; 4: 89-.
- 372 11. Surendran S, Sivabalakrishnan K, Sivasingham A, et al. Anthropogenic Factors  
373 Driving Recent Range Expansion of the Malaria Vector *Anopheles stephensi*. Front.  
374 Public Health **2019**; 7: 53.
- 375 12. Surendran SN, Sivabalakrishnan K, Sivasingham A, et al. Anthropogenic Factors  
376 Driving Recent Range Expansion of the Malaria Vector *Anopheles stephensi*.  
377 Frontiers in Public Health **2019**; 7(53).
- 378 13. Faulde MK, Rueda LM, Khaireh BA. First record of the Asian malaria vector  
379 *Anopheles stephensi* and its possible role in the resurgence of malaria in Djibouti,  
380 Horn of Africa. Acta Trop **2014**; 139: 39-43.
- 381 14. Carter TE, Yared S, Gebresilassie A, et al. First detection of *Anopheles stephensi*  
382 Liston, 1901 (Diptera: culicidae) in Ethiopia using molecular and morphological  
383 approaches. Acta Trop **2018**; 188: 180-6.
- 384 15. World Health Organization. Vector alert: *Anopheles stephensi* invasion and spread  
385 Available at: [https://www.who.int/publications-detail/vector-alert-anopheles-](https://www.who.int/publications-detail/vector-alert-anopheles-stephensi-invasion-and-spread)  
386 [stephensi-invasion-and-spread](https://www.who.int/publications-detail/vector-alert-anopheles-stephensi-invasion-and-spread). Accessed 08 November.
- 387 16. Seyfarth M, Khaireh BA, Abdi AA, Bouh SM, Faulde MK. Five years following first  
388 detection of *Anopheles stephensi* (Diptera: Culicidae) in Djibouti, Horn of Africa:  
389 populations established—malaria emerging Parasitology Research **2019**.

- 390 17. City Population. The population of the regions of Ethiopia. Available at:  
391 <http://www.citypopulation.de/Ethiopia.html>. Accessed 08 November.
- 392 18. Climate data. Climate: Ethiopia. Available at: [https://en.climate-](https://en.climate-data.org/africa/ethiopia-249/)  
393 [data.org/africa/ethiopia-249/](https://en.climate-data.org/africa/ethiopia-249/). Accessed 08 November.
- 394 19. Balkew M, Mumba P, Dengela D, et al. Geographical distribution of *Anopheles*  
395 *stephensi* in eastern Ethiopia. *bioRxiv* **2019**: 802587.
- 396 20. Gillies MT, Coetee M. The supplement to the anophelinae of Africa south of the  
397 sahara(Afrotropical Region). South African Institute for Medical Research **1987**;  
398 (55).
- 399 21. Snounou G, Viriyakosol S, Zhu XP, et al. High sensitivity of detection of human  
400 malaria parasites by the use of nested polymerase chain reaction. *Mol Biochem*  
401 *Parasitol* **1993**; 61(2): 315-20.
- 402 22. Schriefer ME, Sacchi JB, Jr., Wirtz RA, Azad AF. Detection of polymerase chain  
403 reaction-amplified malarial DNA in infected blood and individual mosquitoes. *Exp*  
404 *Parasitol* **1991**; 73(3): 311-6.
- 405 23. Kent RJ, Norris DE. Identification of mammalian blood meals in mosquitoes by a  
406 multiplexed polymerase chain reaction targeting cytochrome B. *Am J Trop Med Hyg*  
407 **2005**; 73(2): 336-42.
- 408 24. Folmer O, Black M, Hoeh W, Lutz R, Vrijenhoek R. DNA primers for amplification  
409 of mitochondrial cytochrome c oxidase subunit I from diverse metazoan  
410 invertebrates. *Mol Mar Biol Biotechnol* **1994**; 3(5): 294-9.
- 411 25. Hall TA. BioEdit: a user-friendly biological sequence alignment editor and analysis  
412 program for Windows 95/98/NT. In: *Nucleic acids symposium series*: [London]:  
413 Information Retrieval Ltd., c1979-c2000., 1999:95-8.

- 414 26. Altschul SF, Gish W, Miller W, Myers EW, Lipman DJ. Basic local alignment search  
415 tool. *J Mol Biol* **1990**; 215(3): 403-10.
- 416 27. Kumar S, Stecher G, Li M, Knyaz C, Tamura K. MEGA X: Molecular Evolutionary  
417 Genetics Analysis across Computing Platforms. *Mol Biol Evol* **2018**; 35(6): 1547-9.
- 418 28. Salit A, Zakaria M, Balba M, Zaghoul T. The mosquito fauna of Kuwait.  
419 *JOURNAL-UNIVERSITY OF KUWAIT SCIENCE* **1994**; 21: 77-.
- 420 29. Al-Ghamdi K, Alikhan M, Mahyoub J, Afifi Z. Studies on identification and  
421 population dynamics of anopheline mosquitoes from Jeddah province of Saudi  
422 Arabia. *Biosci Biotechnol Res Commun* **2008**; 1: 19-24.
- 423 30. Subbarao SK, Vasantha K, Adak T, Sharma VP, Curtis CF. Egg-float ridge number in  
424 *Anopheles stephensi*: ecological variation and genetic analysis. *Med Vet Entomol*  
425 **1987**; 1(3): 265-71.
- 426 31. Tadesse FG, Slater HC, Chali W, et al. The Relative Contribution of Symptomatic  
427 and Asymptomatic *Plasmodium vivax* and *Plasmodium falciparum* Infections to the  
428 Infectious Reservoir in a Low-Endemic Setting in Ethiopia. *Clin Infect Dis* **2018**;  
429 66(12): 1883-91.
- 430 32. Kiattibutr K, Roobsoong W, Sriwichai P, et al. Infectivity of symptomatic and  
431 asymptomatic *Plasmodium vivax* infections to a Southeast Asian vector, *Anopheles*  
432 *dirus*. *Int J Parasitol* **2017**; 47(2-3): 163-70.
- 433 33. Alahmed AM. Mosquito fauna (Diptera: Culicidae) of the Eastern Region of Saudi  
434 Arabia and their seasonal abundance. *Journal of King Saud University-Science* **2012**;  
435 24(1): 55-62.

- 436 34. Ferreira Goncalves MJ, Alecrim WD. Non-planned urbanization as a contributing  
437 factor for malaria incidence in Manaus-Amazonas, Brazil. *Revista de salud publica*  
438 (Bogota, Colombia) **2004**; 6(2): 156-66.
- 439 35. Roche R, Bain R, Cumming O. A long way to go - Estimates of combined water,  
440 sanitation and hygiene coverage for 25 sub-Saharan African countries. *PLoS One*  
441 **2017**; 12(2): e0171783.
- 442 36. Takken W, Lindsay S. Increased Threat of Urban Malaria from *Anopheles stephensi*  
443 Mosquitoes, Africa. *Emerg Infect Dis* **2019**; 25(7): 1431-3.
- 444 37. Surendran SN, Sivabalakrishnan K, Gajapathy K, et al. Genotype and biotype of  
445 invasive *Anopheles stephensi* in Mannar Island of Sri Lanka. *Parasit Vectors* **2018**;  
446 11(1): 3.
- 447 38. Lilay A, Asamene N, Bekele A, et al. Reemergence of yellow fever in Ethiopia after  
448 50 years, 2013: epidemiological and entomological investigations. *BMC Infectious*  
449 *Diseases* **2017**; 17(1): 343.
- 450 39. Ferede G, Tiruneh M, Abate E, et al. A serologic study of dengue in northwest  
451 Ethiopia: Suggesting preventive and control measures. *PLoS neglected tropical*  
452 *diseases* **2018**; 12(5): e0006430.
- 453 40. Gutu MA, Bekele A, Seid Y, et al. Another dengue fever outbreak in eastern Ethiopia  
454 – an emerging public health threat (Under Review).
- 455 41. Daniel E, Eshetu N, Techalew S, et al. Sero-positivity of dengue virus and its  
456 associated factors among febrile patients in Arbaminch districts, Southern Ethiopia  
457 (Under Review).

- 458 42. Thomas S, Ravishankaran S, Justin JA, et al. Overhead tank is the potential breeding  
459 habitat of *Anopheles stephensi* in an urban transmission setting of Chennai, India.  
460 *Malar J* **2016**; 15(1): 274.
- 461 43. Mengesha Tsegaye M, Tayachew A, Belay D, Alemu A, Beyene B. A35 The first  
462 laboratory confirmation of chikungunya outbreak in Ethiopia. *Virus Evolution* **2019**;  
463 5(Supplement\_1): vez002. 34.
- 464 44. Degife LH, Worku Y, Belay D, Bekele A, Hailemariam Z. Factors associated with  
465 dengue fever outbreak in Dire Dawa administration city, October, 2015, Ethiopia -  
466 case control study. *BMC Public Health* **2019**; 19(1): 650.
- 467 45. Lilay A, Asamene N, Bekele A, et al. Reemergence of yellow fever in Ethiopia after  
468 50 years, 2013: epidemiological and entomological investigations. *BMC Infect Dis*  
469 **2017**; 17(1): 343.
- 470 46. World Health Organization. A toolkit for integrated vector management in sub-  
471 Saharan Africa. Available at:  
472 [https://www.who.int/neglected\\_diseases/resources/9789241549653/en/](https://www.who.int/neglected_diseases/resources/9789241549653/en/). Accessed 16  
473 December.
- 474 47. Donnelly MJ, McCall PJ, Lengeler C, et al. Malaria and urbanization in sub-Saharan  
475 Africa. *Malar J* **2005**; 4(1): 12.  
476  
477



478 **Table 1. Characteristics of the aquatic habitats surveyed**

| <b>Characteristics</b>                                  |                                    | <b>Habitat<br/>s</b> | <b>Larvae<br/>detected</b> | <b>Pupae<br/>detected</b> |
|---------------------------------------------------------|------------------------------------|----------------------|----------------------------|---------------------------|
| <b>Localities<br/>within the<br/>town<br/>(Kebeles)</b> | Sebat Killo                        | 60                   | 73.3% (44/60)              | 43.2% (19/44)             |
|                                                         | Lemlefan                           | 17                   | 70.6% (12/17)              | 0% (0/12)                 |
|                                                         | Alalamo                            | 8                    | 100.0% (8/8)               | 62.5% (5/8)               |
| <b>Water body<br/>type</b>                              | Permanent                          | 48                   | 85.4% (41/48)              | 41.5% (17/41)             |
|                                                         | Temporary                          | 37                   | 62.2% (23/37)              | 30.4% (7/23)              |
| <b>Shade status</b>                                     | Fully shaded                       | 22                   | 63.6% (14/22)              | 42.9% (6/14)              |
|                                                         | Partially shaded                   | 24                   | 99.7% (22/24)              | 31.8% (7/22)              |
|                                                         | Not shaded                         | 39                   | 71.8% (28/39)              | 39.3% (11/28)             |
| <b>Usage</b>                                            | in use                             | 71                   | 76.1% (54/71)              | 37.0% (20/54)             |
|                                                         | not in use                         | 14                   | 71.4% (10/14)              | 40.0% (4/10)              |
| <b>Container<br/>material</b>                           | Fiber jar/tyre                     | 23                   | 43.5% (10/23)              | 40.0% (4/10)              |
|                                                         | Metal (steel<br>tanks/drum/barrel) | 17                   | 94.1% (16/17)              | 31.3% (5/16)              |
|                                                         | Cemented/Ceramic                   | 45                   | 84.4% (38/45)              | 39.5% (15/38)             |
| <b>Cleanliness</b>                                      | Clean water                        | 56                   | 80.4% (45/56)              | 37.8% (17/45)             |
|                                                         | Turbid water                       | 28                   | 67.9% (19/28)              | 36.8% (7/19)              |

479

480

481 **Table 2. Membrane feeding assays: characteristics of malaria patients and mosquito**  
 482 **feeding outcomes.**

|                                                                       | <i>P. vivax</i>   | <i>P. falciparum</i> | Mixed species     |
|-----------------------------------------------------------------------|-------------------|----------------------|-------------------|
| <b>N</b>                                                              | 36                | 7                    | 4                 |
| <b>Parasites/μL, median (IQR)</b>                                     | 7783 (3603-13440) | 2431 (867-8756)      | 4516 (1589-10563) |
| <b>Gametocyte positivity, % (n/N)</b>                                 | 73.5 (25/34)      | 14.3 (1/7)           | 25.0 (1/4)        |
| <b>Infectious feeds, % (n/N)</b>                                      | 72.2 (26/36)      | 14.3 (1/7)           | 50.0 (2/4)        |
| <b>Infected <i>An. stephensi</i>, % (n/N)</b>                         | 52.5 (446/849)    | 2.2 (4/180)          | 34.6 (36/104)     |
| <b>Infected <i>An. arabiensis</i>, % (n/N)</b>                        | 45.2 (452/1000)   | 9.0 (18/200)         | 36.9 (45/122)     |
| <b>Oocyst per infected <i>An. arabiensis</i> midgut, median (IQR)</b> | 15 (5-35)         | NA                   | 3 (2-5)           |
| <b>Oocyst per infected <i>An. stephensi</i> midgut, median (IQR)</b>  | 20 (7-35)         | NA                   | 3 (2-8)           |

483 Parasite and gametocyte densities were determined by microscopy; IQR, Interquartile range;

484 NA, not available.

485

486 **Figure legends:**

487 **Figure 1. Map of study site, *An. stephensi* aquatic habitats and adult mosquito resting**

488 **sites.** Indicated are the map of Ethiopia with regional boundaries and study site (starred) (A)

489 and an aerial view of Awash town (B) with larvae/pupae (red dots) and adult mosquito

490 collection sites (blue dots).

491 **Figure 2. *An. stephensi* larval habitats.** Images are of waterbodies that were infested with

492 developmental stages of *An. stephensi*, namely water reservoirs made of bricks or cemented

493 tanks (A – B), custom-made metal containers (C and D), barrels (E – F) or plastic containers

494 (G – H). The median volume of the aquatic containers was 4m<sup>3</sup> (IQR, 1.0 – 15.6) and ranged

495 from 0.06m<sup>3</sup> to 360m<sup>3</sup>. The majority of the containers were uncovered and were in use for

496 household (32) and construction purposes (34). The material from which the different types

497 of reservoirs were made of included cement (n=45), plastic (n=9), fiber (n=14) and steel

498 (n=17).

499 **Figure 3. Comparison of feeding efficiency and infection rates for *An. stephensi* and *An.***

500 ***arabiensis* in paired feeding experiments.** The percentage of fully fed mosquitoes for *An.*

501 *arabiensis* (red circles) and *An. stephensi* (green circles) (A). The percentage infected

502 mosquitoes for the two mosquito sources (*An. stephensi* on the Y-axis and *An. arabiensis* on

503 the X-axis) (B). The Bland-Altman plot (difference plots) for mosquito infection rates in

504 different mosquito species (C). Symbols indicate the difference in infection rate in *An.*

505 *stephensi* versus *An. arabiensis* (Y-axis) in relation to average infection rate in these two

506 species (X-axis). Positive values (57.1%; 16/28) indicate a higher infection rate in *An.*

507 *stephensi*; dotted lines indicate the 95% limits of agreement. There was no evidence that

508 correlation coefficient between the paired differences and means differed significantly from

509 zero (Pitman's Test of difference in variance,  $r=0.026$ ,  $P=0.864$ ).

510 **Figure 4. Comparison of oocyst intensity and prevalence for *An. stephensi* and *An.***  
511 ***arabiensis* in paired feeding experiments.** Oocyst intensity (number of oocysts per  
512 dissected midgut) for individual mosquitoes of each of the two species (A). The violin plot  
513 presents the estimated kernel density, the median is indicated with horizontal lines, the  
514 interquartile range by the box and upper and lower-adjacent values by the spikes. In panel B,  
515 oocyst prevalence (proportion of midguts with detectable oocyst) (Y-axis) is indicated in  
516 association with Log<sub>10</sub> transformed oocyst intensity (X-axis) for *An. stephensi* (green dots)  
517 and *An. arabiensis* (orange dots). Data are presented for 24 feeding experiments where 723  
518 *An. arabiensis* and 643 *An. stephensi* were dissected.

519 **Figure 5. Maximum-likelihood phylogenies of ITS2 (left) and COI (right).** Maximum-  
520 likelihood topologies were constructed using representative reference sequences with  
521 published geographical data downloaded from GenBank. Within the Ethiopian population,  
522 due to the presence of a hyper-variable microsatellite region, ITS2 sequences (A) were  
523 trimmed to create a consensus alignment of 289bp; one polymorphic site separated samples  
524 into two genotypes (indicated with filled asterisk together with the previously reported  
525 genotype, MH650999, Carter, et al. [14] in unfilled asterisk). COI sequences (B) were  
526 assembled into a consensus alignment of 687bp; a total of four variable sites were identified,  
527 corresponding to four haplotypes (indicated with filled asterisk together with the previously  
528 reported genotype, MH651000, Carter, et al. [14], unfilled asterisk). Nucleotide sequences  
529 for ITS2 and COI were deposited in GenBank under the following accession numbers:  
530 Ethiopia Genotype1, MN826065; Ethiopia Genotype2, MN826066; Ethiopia Haplotype1,  
531 MN826067; Ethiopia Haplotype2, MN826068; Ethiopia Haplotype3, MN826069; and  
532 Ethiopia Haplotype4, MN826070.

533

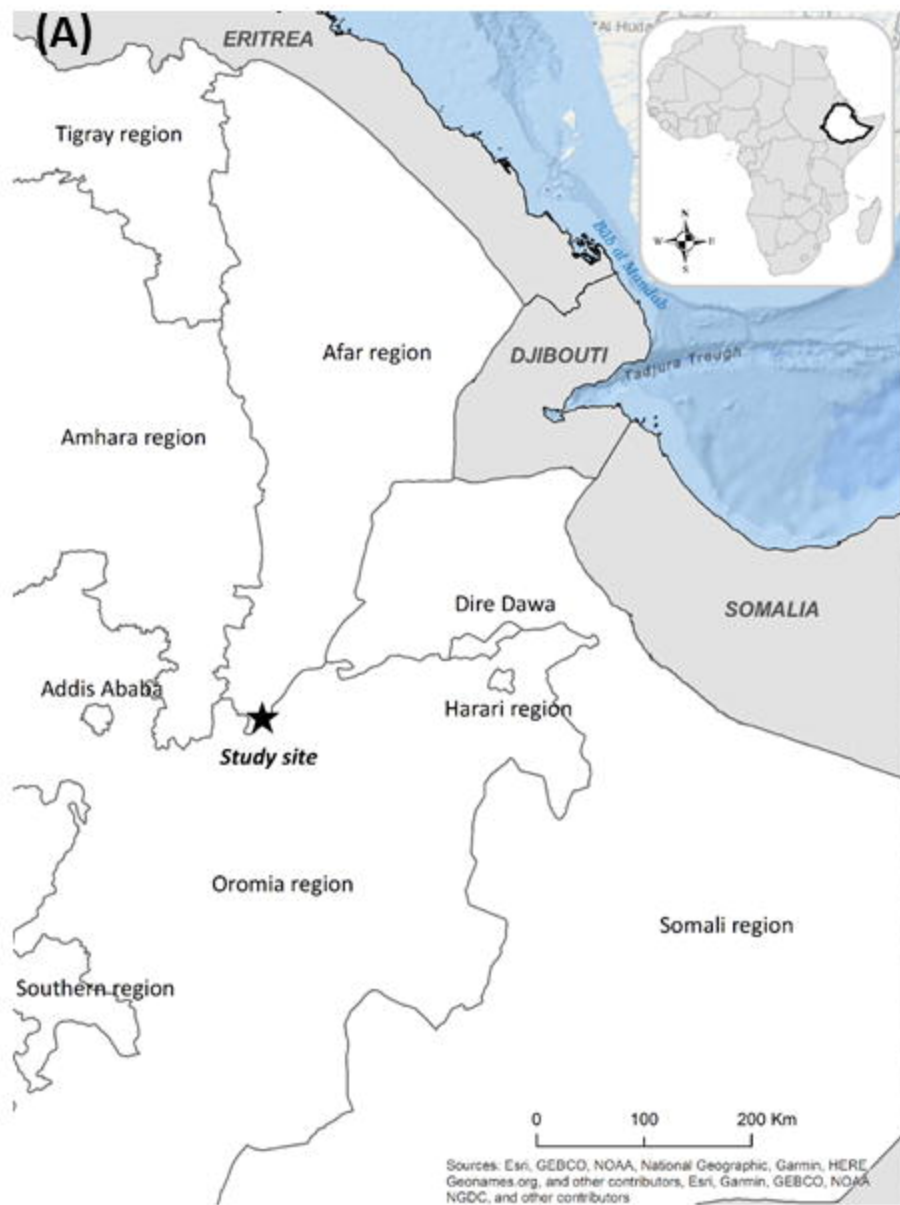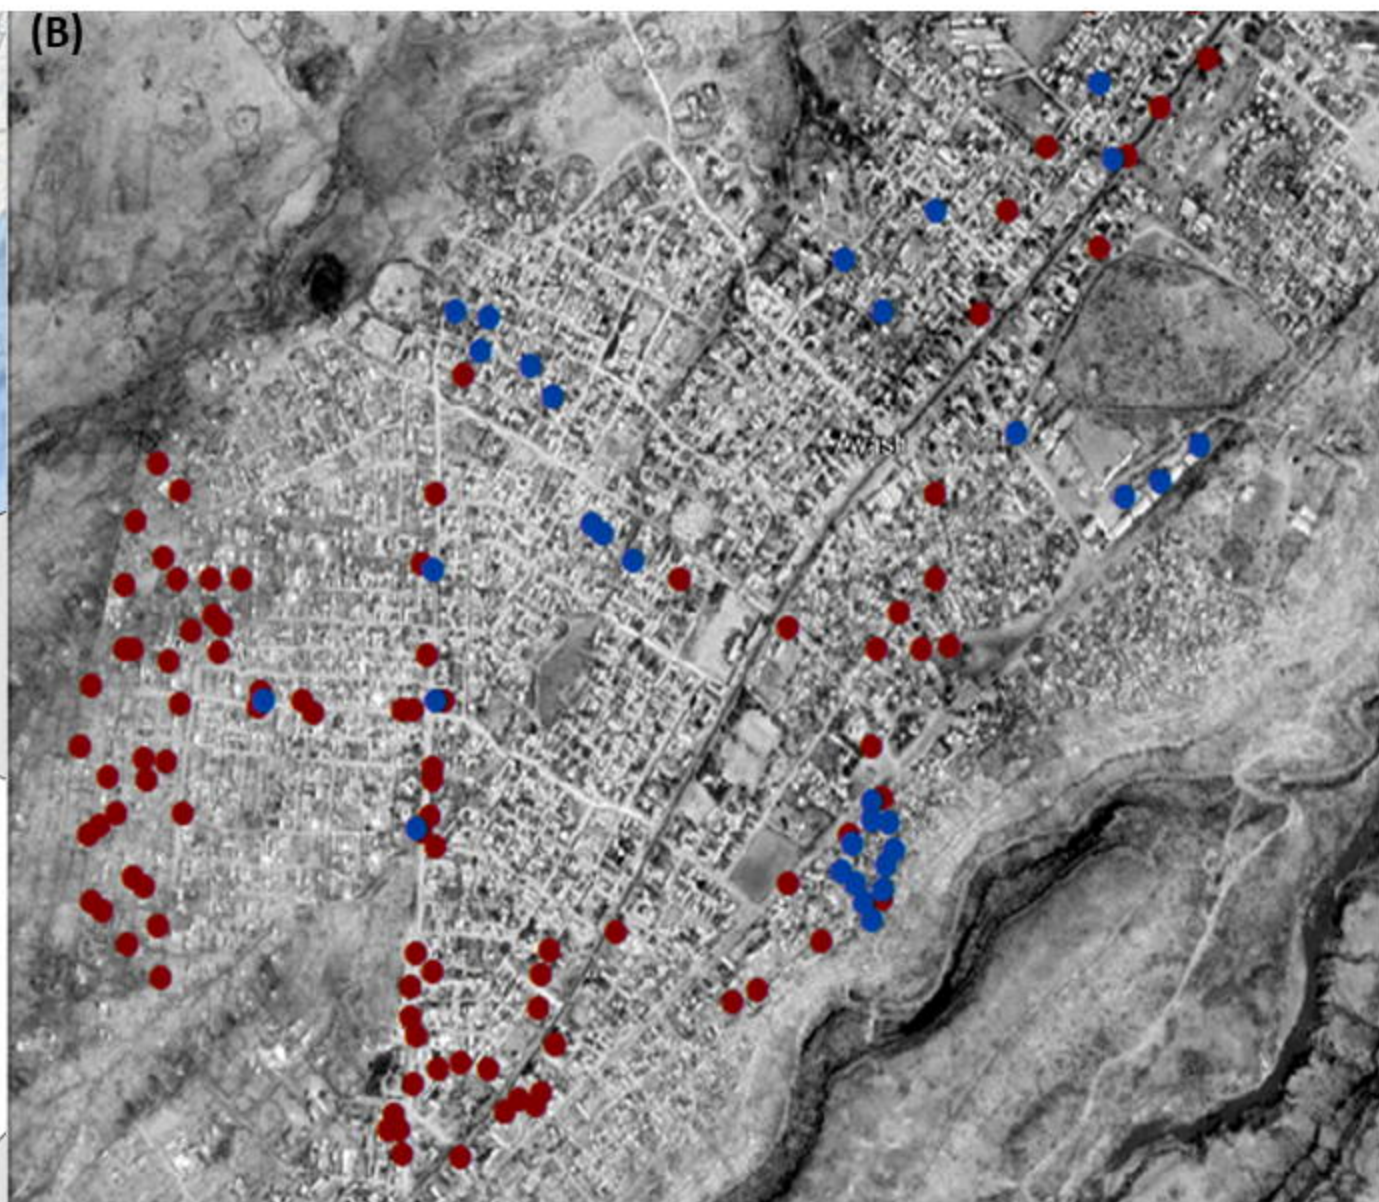

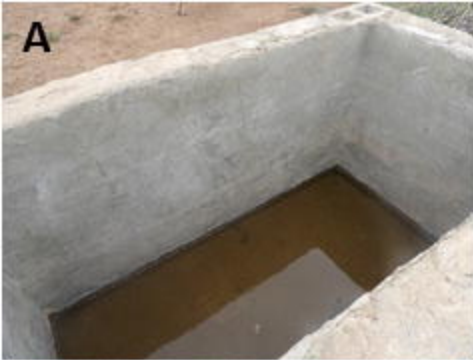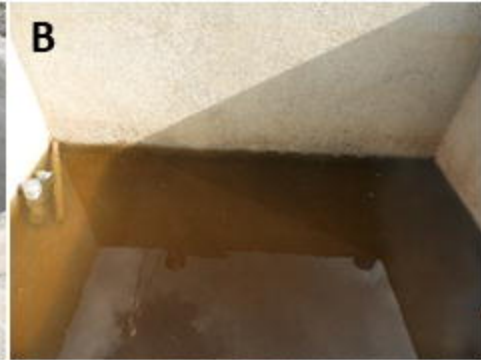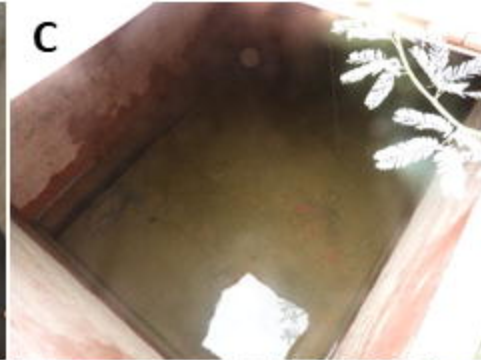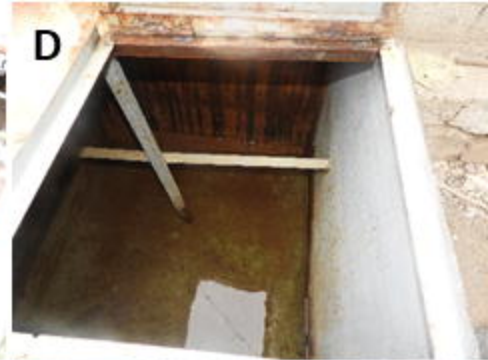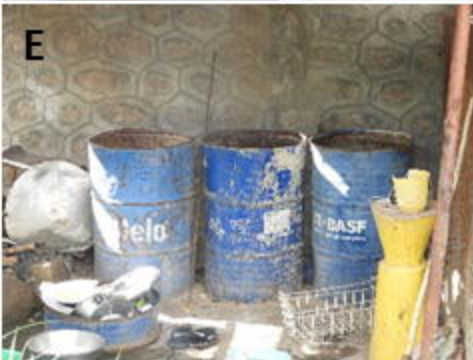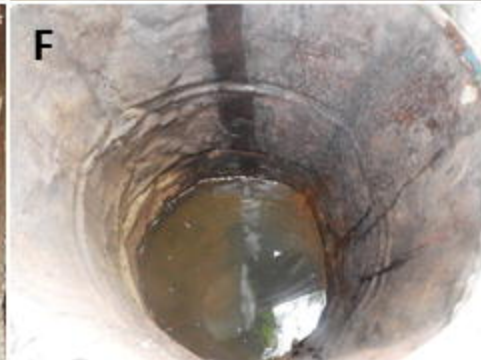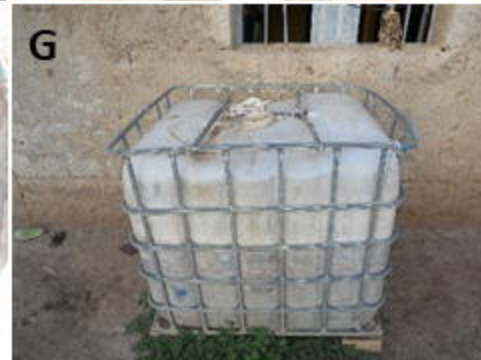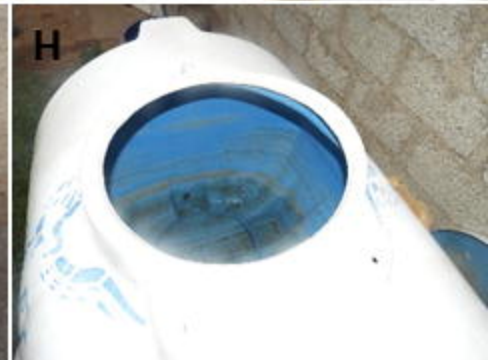

**(A)**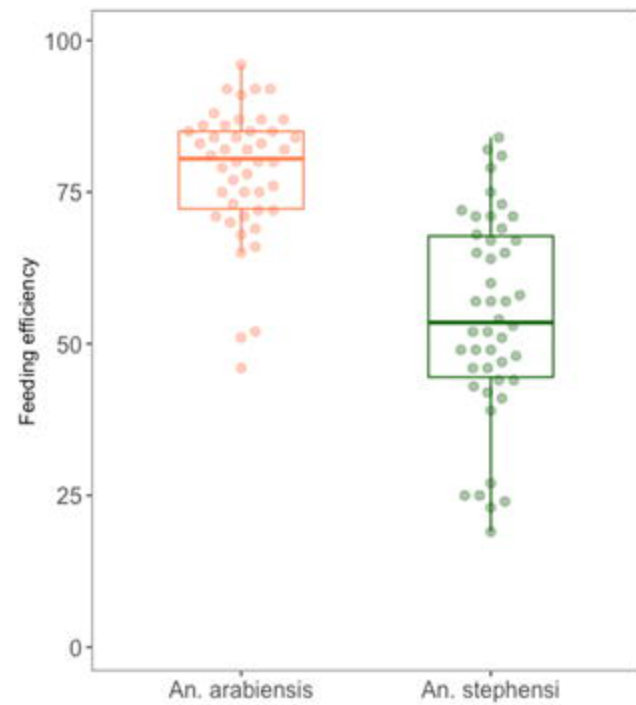**(B)**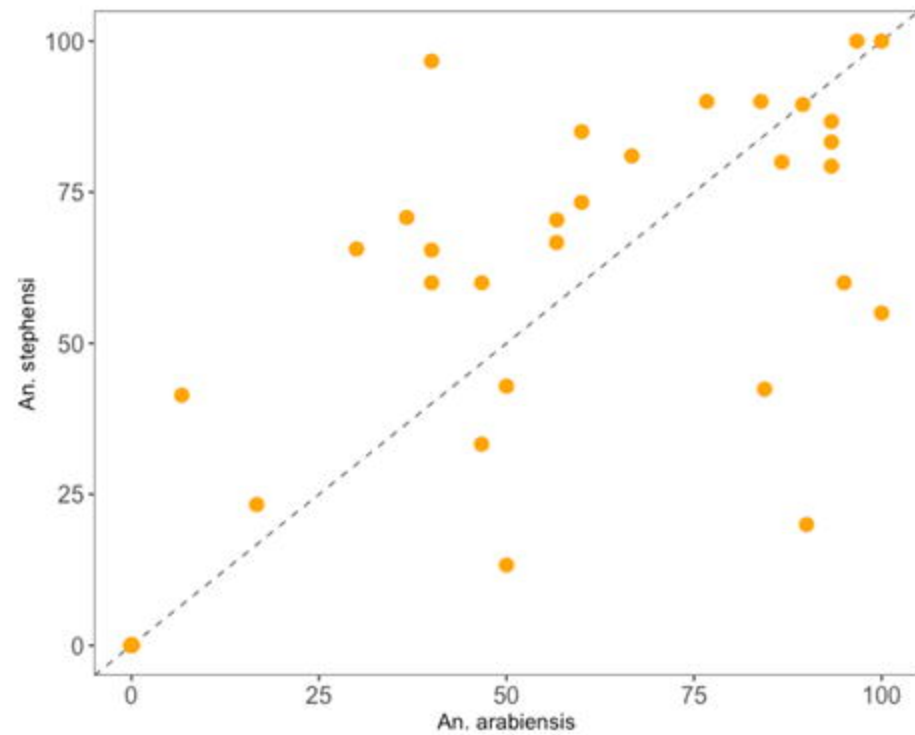**(C)**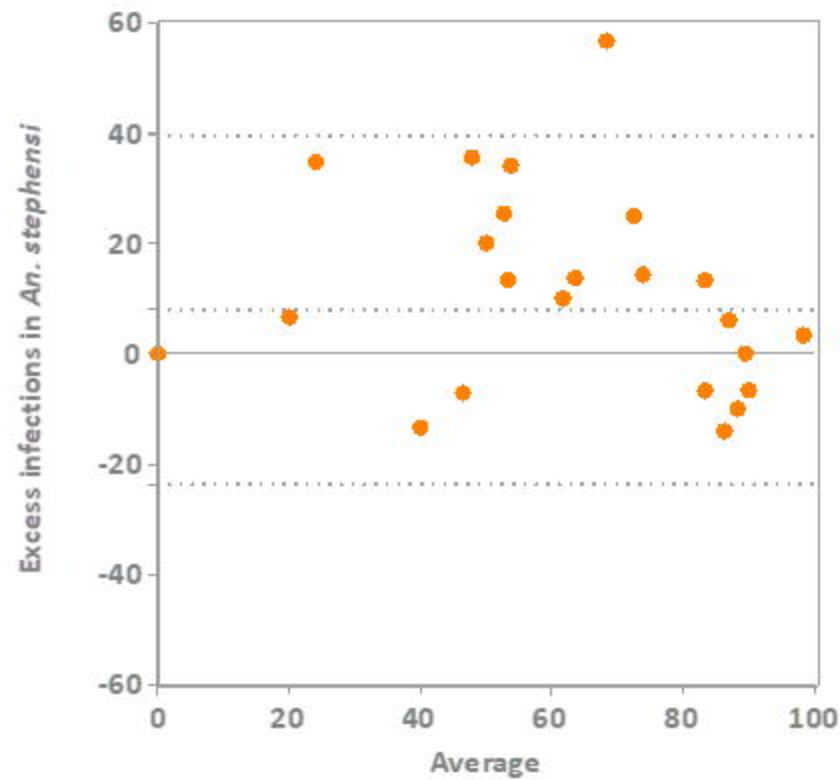

(A)

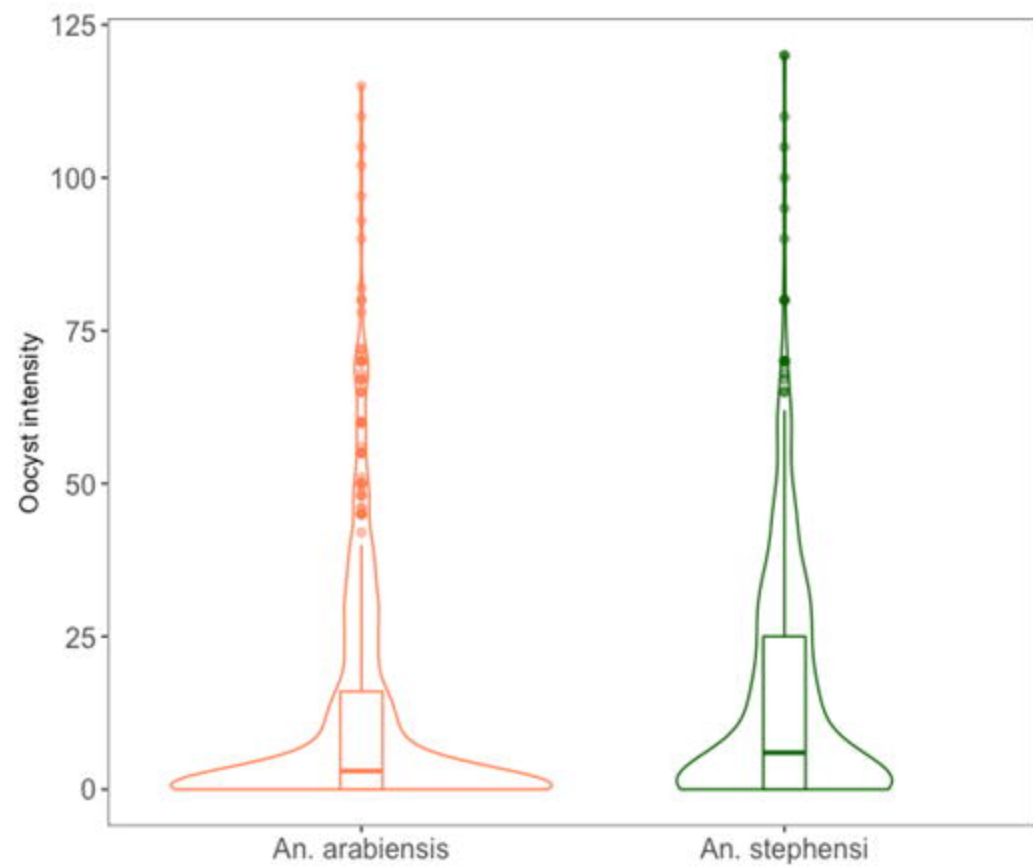

(B)

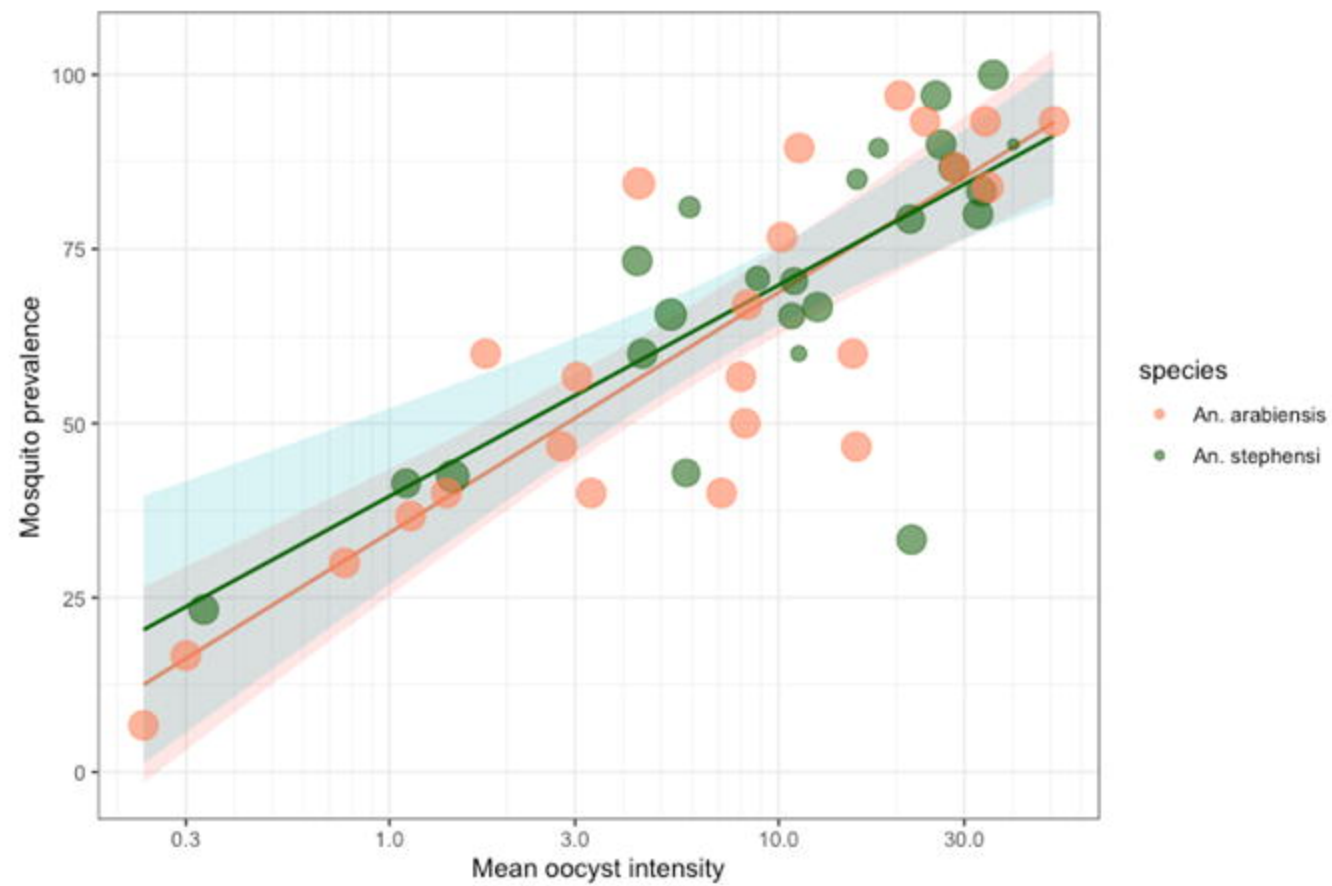



**(A)**

Anopheles Stephansi Ethiopia Genotype 1 ★  
 KM052589 AnStephensi Saudi Arabia  
 KF933379 AnStephensi Djibouti  
 AY702484 AnStephensi Iran  
 EU359661 AnStephensi India  
 AY702482 AnStephensi Iran  
 44 Anopheles Stephansi Ethiopia Genotype 2 ★  
 FJ526599 AnStephensi United Arab Emirates  
 MH650999 AnStephensi Ethiopia ☆  
 FJ154840 AnStephensi China  
 100 FJ011430 AnStephensi China  
 EU346652 AnStephensi Iraq  
 DQ662409 AnStephensi Iran  
 AY842526 AnStephensi Iran  
 EU346653 AnStephensi Iraq  
 63 AY842520 AnStephensi Iran  
 100 KJ522817 AnMaculipalpis Kenya  
 JN994142 AnMaculipalpis Zambia  
 KR014835 AnMaculipalpis Zambia  
 54 JQ446420 AnSawadwongporni India  
 JQ446412 AnWillmori India  
 JQ446411 AnWillmori India  
 100 EU882061 AnWillmori Buhtan  
 JF323947 AnMaculatus Tibet  
 AF512552 AnWillmori China

0.050

**(B)**

MF975724 Sri Lanka  
 MF975723 Sri Lanka  
 MF975725 Sri Lanka  
 MF975726 Sri Lanka  
 MF975727 Sri Lanka  
 MF975728 Sri Lanka  
 MK170098 United Arab Emirates  
 KX467337 India  
 MH538704 India  
 KT382827 Pakistan  
 KJ528895 Saudi Arabia  
 KF406681 Pakistan  
 KF406680 Pakistan  
 GU908046 South Africa  
 58 FJ210894 Iran  
 FJ210893 Iran  
 AF425844 South Africa  
 Ethiopia Haplotype 3 ★  
 64 KF933378 Djibouti  
 MF975731 Sri Lanka  
 MH538703 India  
 60 MF975730 Sri Lanka  
 MF975729 Sri Lanka  
 KF406682 Pakistan  
 Ethiopia Haplotype 1 ★  
 Ethiopia Haplotype 2 ☆  
 54 KF406694 Pakistan  
 MH651000 Ethiopia ★  
 MF975722 Sri Lanka  
 Ethiopia Haplotype 4 ★  
 KJ528889 Saudi Arabia  
 KJ528894 Saudi Arabia  
 99 KJ528893 Saudi Arabia  
 KJ528888 Saudi Arabia  
 KJ528890 Saudi Arabia  
 53 KJ528891 Saudi Arabia  
 KJ528887 Saudi Arabia  
 KJ528892 Saudi Arabia

0.0020
